# Supplementary material for: Role of Al-based coagulants on a hybrid ozonation–coagulation (HOC) process for WWTP effluent organic matter and ibuprofen removal
Source: Royal Society of Chemistry journal article supplement (doi:10.1039/c8ew00756j), 2019-01-01
Supplement: c8ew00756j1.pdf [file c8ew00756j1.pdf]

1

## Supplementary Information

2 Role of Al-based coagulants on hybrid ozonation-coagulation  
3 (HOC) process for WWTP effluent organic matter and  
4 ibuprofen removal

5

6 *Xin Jin*<sup>1</sup>, *Yong Shi*<sup>1</sup>, *Rui Hou*<sup>1</sup>, *Weijie Zhang*<sup>1</sup>, *Pengkang Jin*<sup>1\*</sup>, *Xiaochang Wang*<sup>1</sup>

7

8 <sup>1</sup> School of Environmental and Municipal Engineering, Xi'an University of  
9 Architecture and Technology, Xi'an, Shaanxi Province, 710055, China

10

11 Corresponding author: Pengkang Jin

12 Phone: +86 13379217572

13 E-mail: pkjin@hotmail.com

14

15

16

17 Number of pages:7

18 Number of text:1

19 Number of figures:10

20

21

22

23

24

25

26

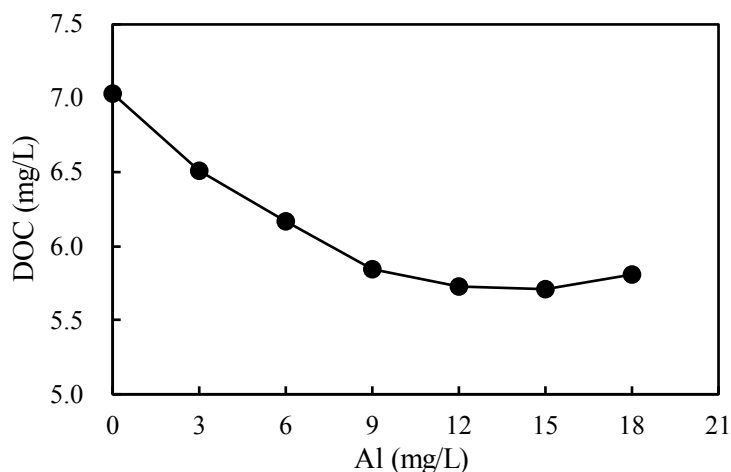

27

28

**Fig. S1** DOC removal performance at different Al dosages at pH 8

29

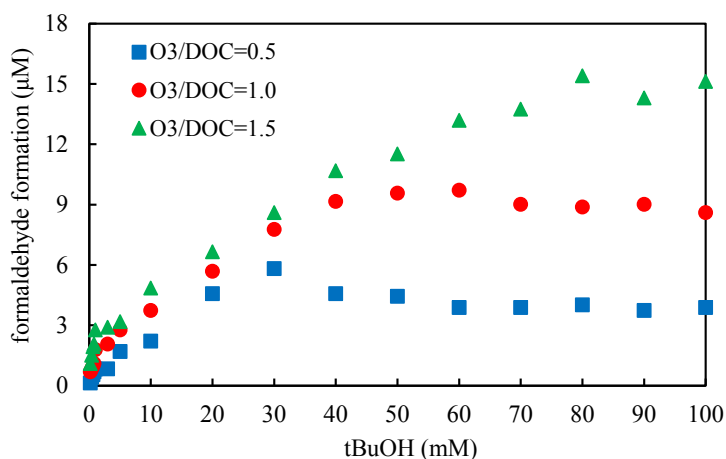

30

31

**Fig. S2** Formaldehyde formation at different tBuOH dosages

32

33 **Text.S1.** UV/H<sub>2</sub>O<sub>2</sub> experiment procedures

34 UV/H<sub>2</sub>O<sub>2</sub> experiment was used to obtain  $\sum k_i[S_i]$ . UV/H<sub>2</sub>O<sub>2</sub> was used to generate

35 •OH, and this experiment was conducted in ultrapure water. Experimental details

36 were modified based on previous work<sup>1</sup>. A Low-pressure mercury lamp (254 nm, 40

37 W, Cnlight) positioned 5 cm above the water surface of the reactor ( $\phi$  5× 4 cm). The

38 solution was adjusted to have concentrations of 12 mg/L [Al], 1 µM pCBA and 2 mM

39 phosphate buffer (pH=8).

40 During the UV/H<sub>2</sub>O<sub>2</sub> experiment, the rate of •OH generation can be calculated  
 41 from Eq. (S1)<sup>2</sup>.

$$42 \quad r_{OH\cdot} = \Phi_{OH} \cdot I_0 \cdot f_{H_2O_2} (1 - e^{-A}) \quad (S1)$$

43 Where  $\Phi_{OH}$  is the quantum yield of •OH at 254 nm, and  $\Phi_{OH}$  is 1.00 in the bulk  
 44 solution<sup>3</sup>.  $I_0$  is the incident light intensity at 254 nm, and it was measured by an  
 45 illuminometer (ST-51X, SENTRY, Taiwan);  $A$  is the fraction of light absorbed by the  
 46 bulk solution, and is given by  $A = 2.303b(\epsilon_{H_2O_2}C_{H_2O_2} + \epsilon_{HO_2^-}C_{HO_2^-} + \epsilon_S C_S)$ , where  
 47  $\epsilon_{H_2O_2} = 17.9-19.6 \text{ M}^{-1} \text{ cm}^{-1}$ ,  $\epsilon_{HO_2^-} = 220 \text{ M}^{-1} \text{ cm}^{-1}$ ,  $\epsilon_S C_S$  is the absorbance of other  
 48 compounds in the water matrix at 254 nm, and  $b$  is the water path length. In this case,  
 49 AlCl<sub>3</sub>•6H<sub>2</sub>O had no UV adsorption at 254 nm. Parameter  $f_{H_2O_2}$  is the fraction of  
 50 absorbed light that is absorbed by H<sub>2</sub>O<sub>2</sub> and HO<sub>2</sub><sup>-</sup>, and is given by  
 51  $f_{H_2O_2} = 2.303b(\epsilon_{H_2O_2}C_{H_2O_2} + \epsilon_{HO_2^-}C_{HO_2^-})/A$ . Based on Eq.(S1), •OH formation during  
 52 UV/H<sub>2</sub>O<sub>2</sub> experiment can be obtained in both ultrapure water and WWTP effluent  
 53 (Fig. S5).

54

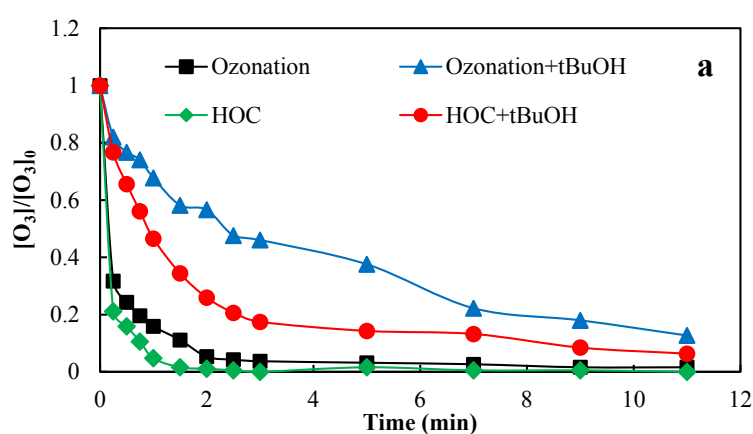

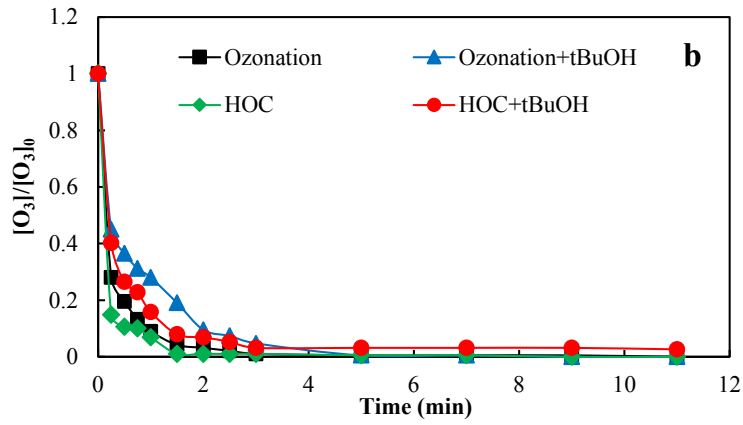

55

56

**Fig. S3** Ozone depletion at pH 8 in the ozonation and HOC processes.

57

a: ultrapure water; b: WWTP effluent. tBuOH dosage: 10mM.

58

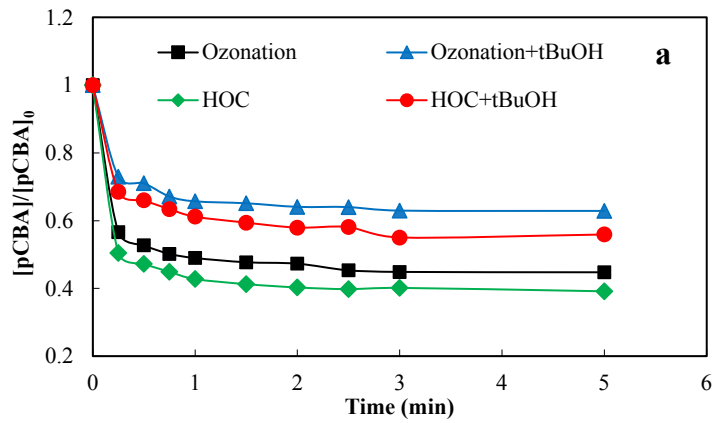

59

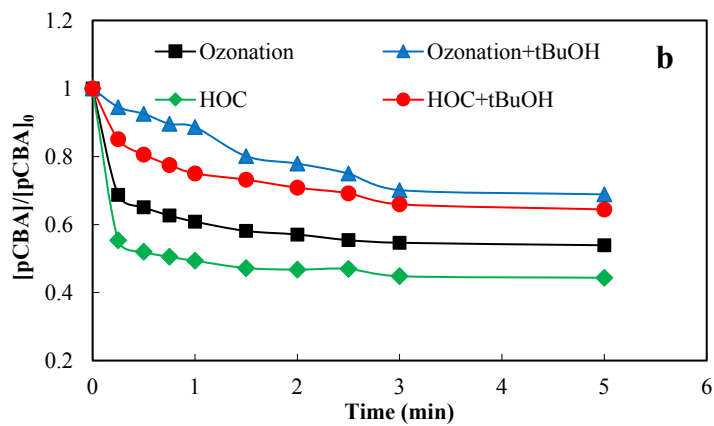

60

61

**Fig. S4** pCBA decomposition at pH=8 in the ozonation and HOC processes.

62

a: ultrapure water; b: WWTP effluent

63

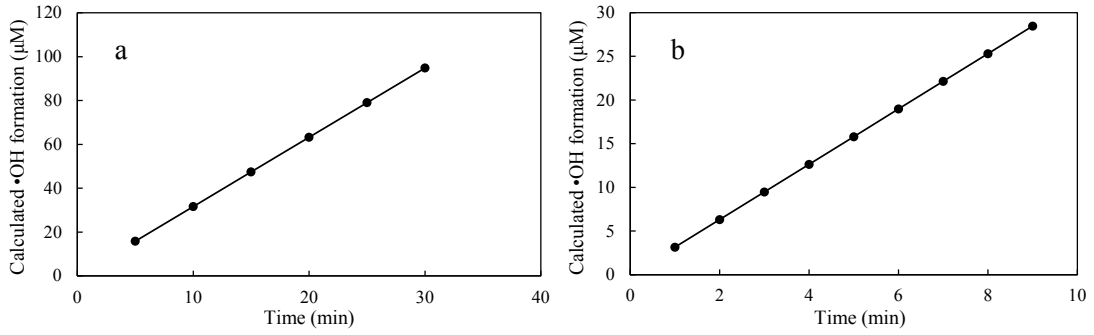

64

65 **Fig. S5** •OH formation during UV/H<sub>2</sub>O<sub>2</sub> experiment in ultrapure water (a) and  
 66 WWTP effluent (b)

67

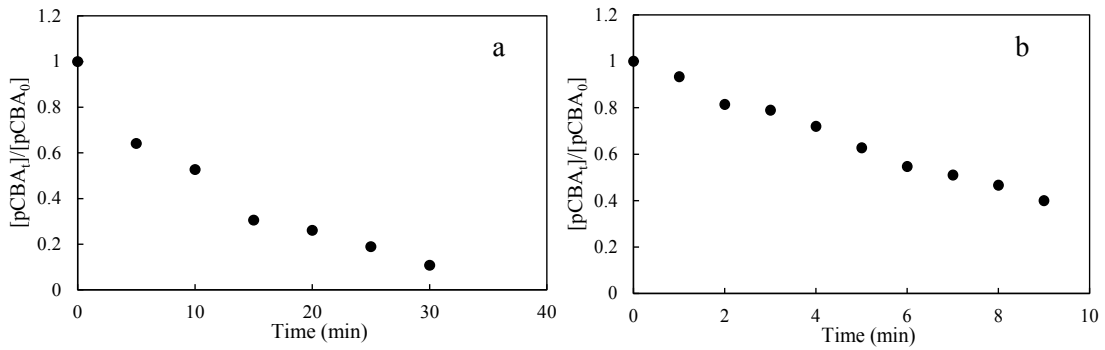

68

69 **Fig. S6** pCBA removal during UV/H<sub>2</sub>O<sub>2</sub> experiment in ultrapure water (a) and  
 70 WWTP effluent (b)

71

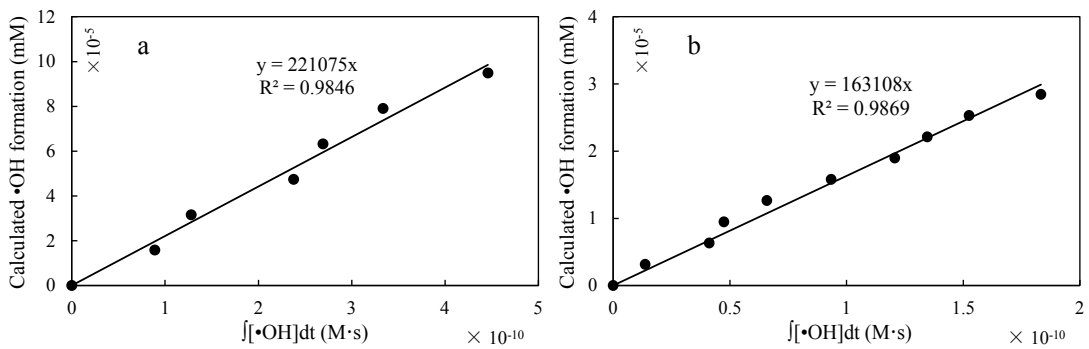

72

73 **Fig. S7**  $\sum k_i[S_i]$  calculation in (a) ultrapure water ( $P = 1\text{E-}5$ ) and (b) WWTP effluent  
 74 ( $P = 1\text{E-}7$ ) (Calculated •OH formation vs.  $\int[\bullet\text{OH}]dt$ ), the slope indicates  $\sum k_i[S_i]$

75

76

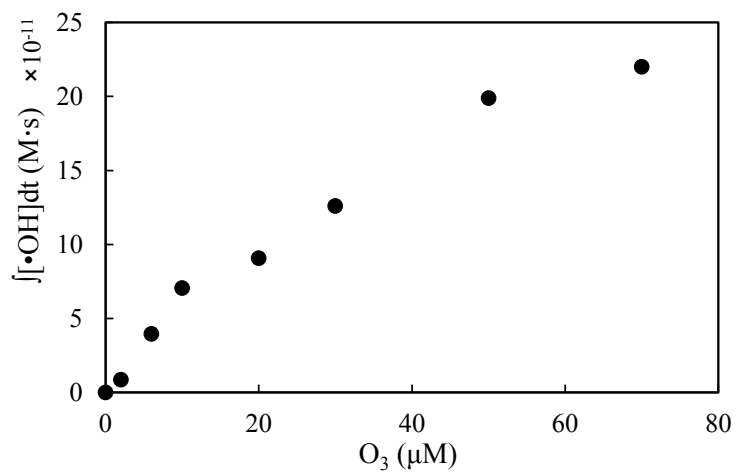

77

78 **Fig. S8** ∫[•OH]dt at different ozone dosages in the HOC process in the ultrapure water

79

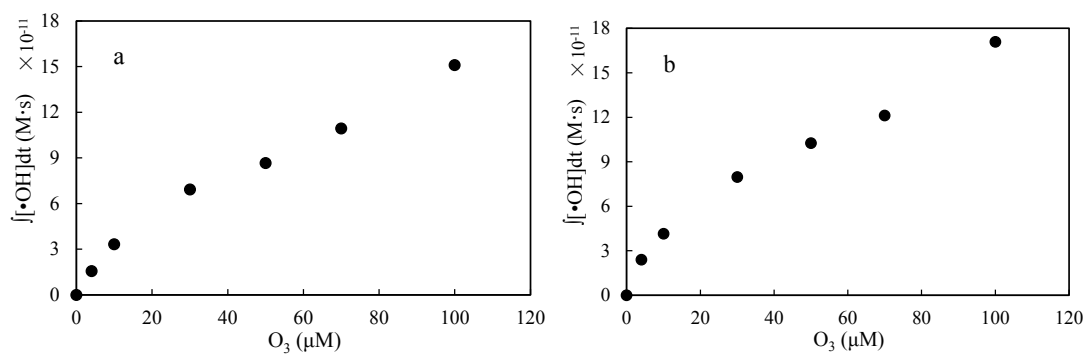

80

81 **Fig. S9** ∫[•OH]dt at different ozone dosages in the HOC process in WWTP effluent. a:

82

without AlCl<sub>3</sub>•6H<sub>2</sub>O; b: with AlCl<sub>3</sub>•6H<sub>2</sub>O

83

84

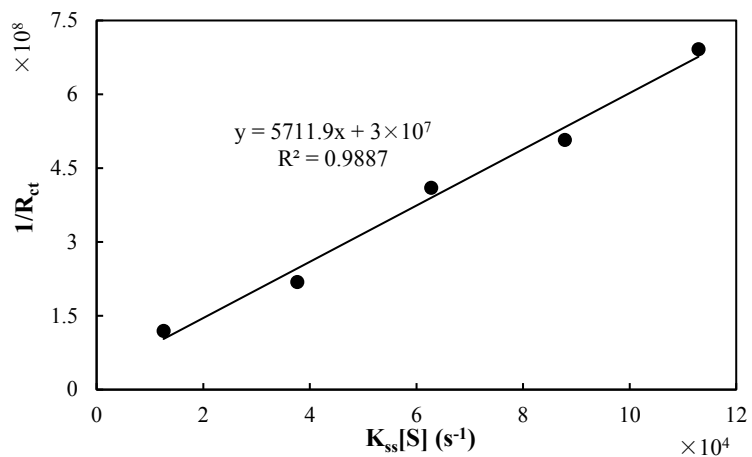

85

86 **Fig. S10** The plots of  $1/R_{ct}$  vs.  $(k_{SS}[S])$  in ultrapure water without  $AlCl_3 \cdot 6H_2O$  ( $P =$

87

5E-4)

88

## 89 References

90 1. Y. Liu, J. Jiang, J. Ma, Y. Yang, C. Luo, X. Huangfu, Z. Guo, Role of the

91 propagation reactions on the hydroxyl radical formation in ozonation and peroxone

92 (ozone/hydrogen peroxide) processes. *Water Res.*, 2015, **68**, 750-758.

93 2. J. C. Crittenden, S. Hu, D. W. Hand, S. A. Green, A kinetic model for  $H_2O_2/UV$

94 process in a completely mixed batch reactor. *Water Res.*, 1999, **33**, 2315-2328.

95 3. J. Baxendale, J. Wilson, The photolysis of hydrogen peroxide at high light

96 intensities. *Transactions of the Faraday Society*, 1957, **53**, 344-356.
